# Supplementary material for: Cissus quadrangularis (Hadjod) Inhibits RANKL-Induced Osteoclastogenesis and Augments Bone Health in an Estrogen-Deficient Preclinical Model of Osteoporosis Via Modulating the Host Osteoimmune System
Source: MDPI journal article supplement (doi:10.3390/cells12020216), 2023-01-04
Supplement: s1 [file s1]

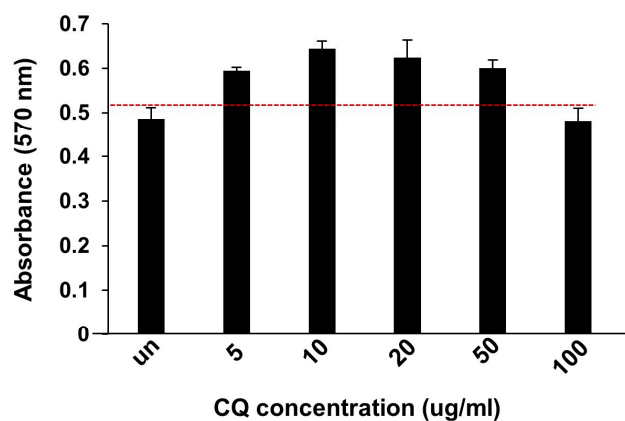

**Figure S1: Cell cytotoxicity assay.** Bone marrow cells (BMCs) were treated with different concentrations of CQ for 48 h and MTT assay was performed for evaluating the cytotoxic effects of CQ.

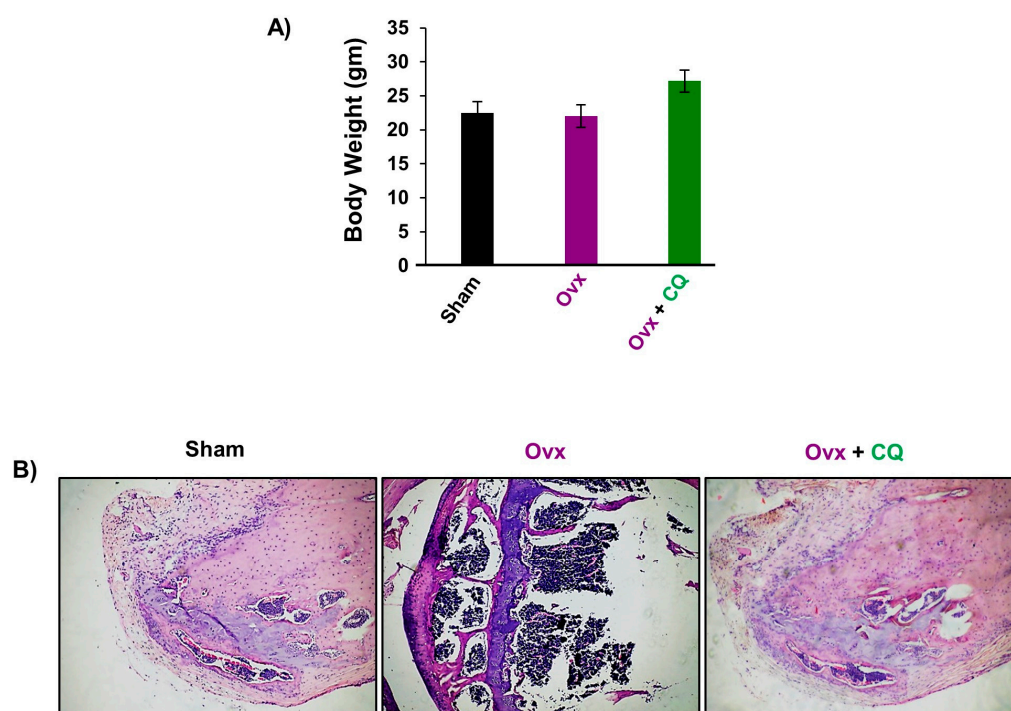

**Figure S2: Histological features of bone specimens: A)** Body weight. **B)** Representative H & E staining of femoral bone sections from each group at 10 X Magnification.

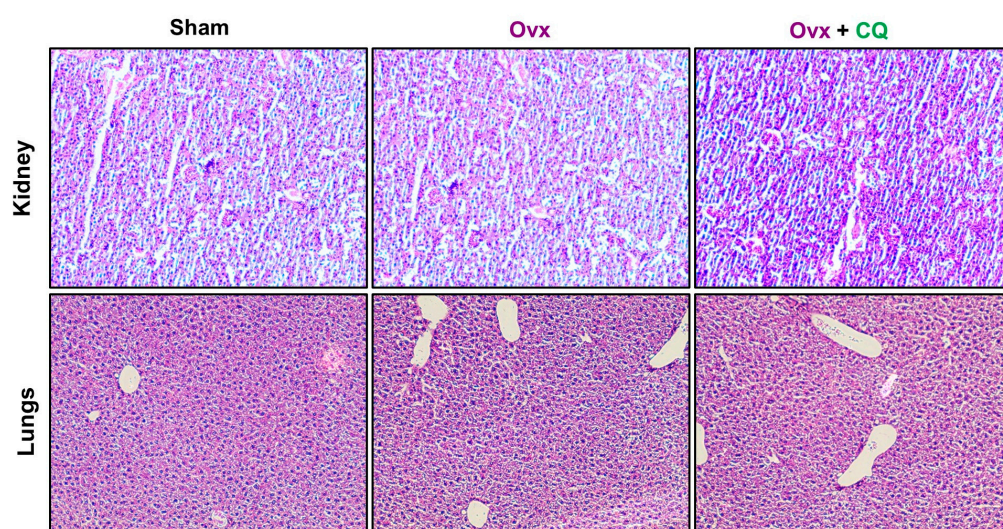

**Figure S3: Histopathological analysis of kidney and lung tissues:** H & E staining of kidney and lung tissue sections in mice of all three groups.

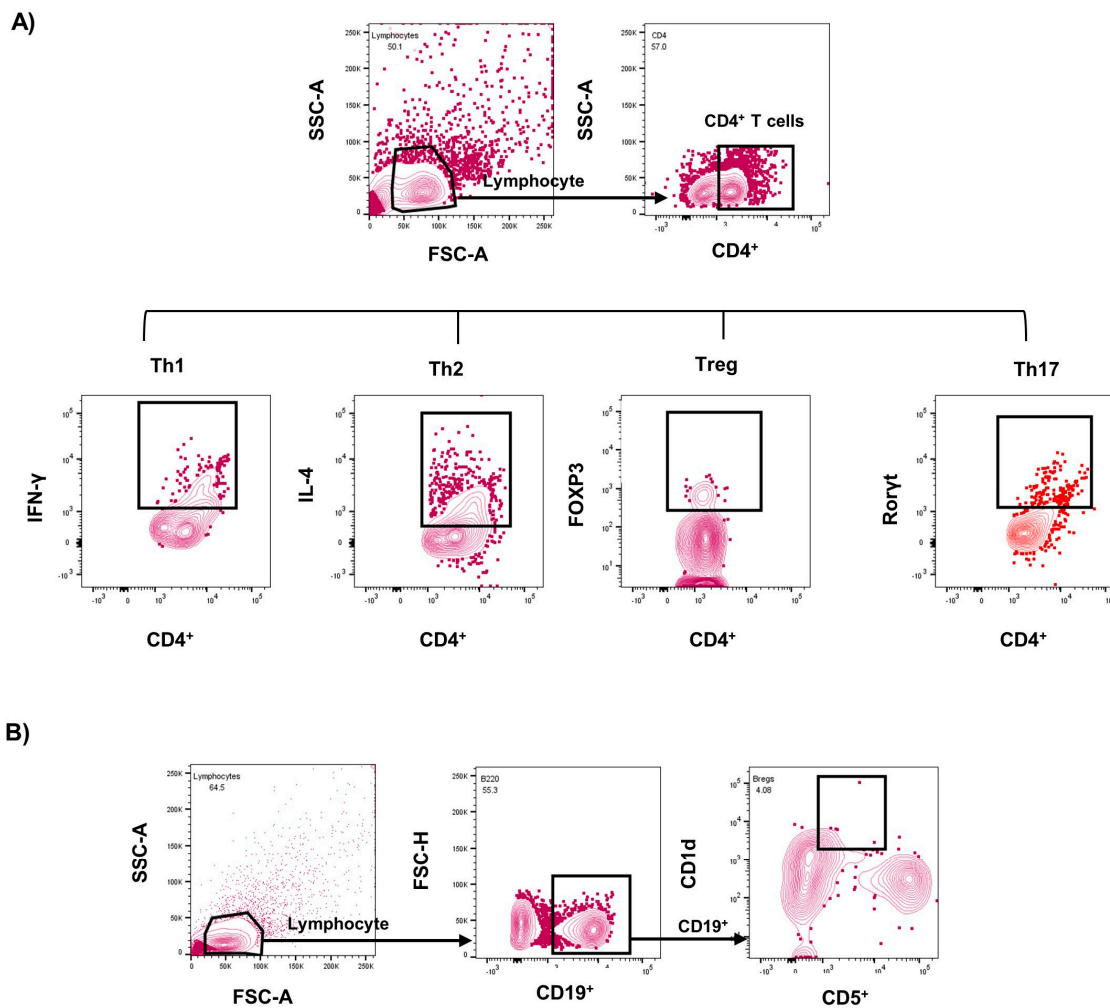

**Figure S4: Gating strategy followed for flow data analysis: A)** Gating strategy for Th1, Th2, Th17 and Tregs and **B)** Gating strategy for Bregs.
